## Fracture risk among stroke survivors

### according to post-stroke disability status and stroke type

Dageong Lee, MD<sup>1\*</sup>, In Young Cho, MD<sup>1,2\*</sup>, Won Hyuk Chang, MD, PhD<sup>2,3</sup>, Jung Eun Yoo, MD, PhD<sup>4</sup>, Hea Lim Choi, MD<sup>2,5</sup>, Jun Hee Park, MD<sup>1,6</sup>, Dong Wook Shin, MD, MBA, DrPH<sup>1,2†\*</sup>, Kyungdo Han, PhD<sup>7†\*</sup>

<sup>1</sup> Department of Family Medicine/Supportive Care Center, Samsung Medical Center, Sungkyunkwan University School of Medicine, Seoul, Republic of Korea

<sup>2</sup> Department of Clinical Research Design & Evaluation, Samsung Advanced Institute for Health Science & Technology, Sungkyunkwan University, Seoul, Republic of Korea

<sup>3</sup> Department of Physical & Rehabilitation Medicine, Samsung Medical Center, Sungkyunkwan University School of Medicine, Seoul, Republic of Korea

<sup>4</sup> Department of Family Medicine, Healthcare System Gangnam Center, Seoul National University Hospital, Seoul, Republic of Korea

<sup>5</sup> Department of Family Medicine/Executive Healthcare Clinic, Severance Hospital, Yonsei University College of Medicine, Seoul, Republic of Korea

<sup>6</sup> Department of Medicine, Sungkyunkwan University School of Medicine, Seoul, Republic of Korea

<sup>7</sup> Department of Statistics and Actuarial Science, Soongsil University, Seoul, Republic of Korea

**NOTE: This preprint reports new research that has not been certified by peer review and should not be used to guide clinical practice.**

23 \*These authors contributed equally.

24

25 †**Corresponding author:**

26

27 Dong Wook Shin, MD, DrPH, MBA

28 Department of Family Medicine/Supportive Care Center, Samsung Medical Center,

29 Sungkyunkwan University School of Medicine

30 Department of Clinical Research Design & Evaluation, Samsung Advanced Institute for

31 Health Science & Technology, Sungkyunkwan University

32 81 Irwon-Ro, Gangnam-gu, Seoul 06351, Republic of Korea

33 Tel: 82-2-3410-5252; Fax: 82-2-3410-0388; E-mail: [dwshin.md@gmail.com](mailto:dwshin.md@gmail.com)

34

35 Kyungdo Han, PhD

36 Department of Statistics and Actuarial Science, Soongsil University, Seoul, Republic of

37 Korea

38 369 Sangdo-Ro, Dongjak-gu, Seoul 06978, Republic of Korea

39 Tel: 82-2-2258-7226; Fax: 82-2-532-6537; E-mail: [hkd917@naver.com](mailto:hkd917@naver.com)

40

41 Word count: 5,979 words

42 **Abstract**

43 **Background:** Stroke survivors face physical and cognitive challenges, including impaired  
44 coordination and balance, which can lead to an increased dependency and a higher risk of  
45 falls. We aimed to investigate the impact of post-stroke disability status and stroke type on  
46 the risk of fracture at various sites compared to a matched comparison group.

47 **Method:** This retrospective cohort study used data from the Korean National Health  
48 Insurance System database (2010-2018) and included a total of 223,358 stroke patients and a  
49 1:1 matched comparison group. Stroke survivors were grouped based on the presence and  
50 severity of their post-stroke disability and stroke type. The primary outcome was the  
51 incidence of newly diagnosed fracture. Cox proportional hazard regression analyses were  
52 used to calculate the hazard ratios of fractures after adjusting for potential confounders.

53 **Results:** Stroke survivors had an increased risk of overall fractures compared to the matched  
54 comparison group (adjusted hazard ratio [aHR] 1.40, 95% confidence interval [CI] 1.37-1.43).  
55 Specifically, the risk of hip fractures was even greater for stroke survivors: aHR 2.42, 95% CI  
56 2.30-2.55. The risk of vertebral fractures (aHR 1.29, 95% CI 1.25-1.34) and other fractures  
57 (aHR 1.19, 95% CI 1.15-1.23) also was higher than that of the control group. The risk of hip  
58 fractures was highest among stroke survivors with severe post-stroke disability (aHR 4.82, 95%  
59 CI 4.28-5.42), while the risk of vertebral or other fractures was highest among those with  
60 mild post-stroke disability. There was no significant difference in fracture risk between  
61 hemorrhagic and ischemic stroke survivors when stratified by disability status.

62 **Conclusion:** Our findings showed an increased risk of subsequent fractures among stroke  
63 survivors, particularly those with post-stroke disability and for hip fracture. Bone health  
64 assessment and treatment should be emphasized as an essential part of stroke management.

65

66 **Keywords:** stroke; fracture; disability; cohort

67

## 68 **Introduction**

69           According to the Global Burden of Diseases 2019, over 12.2 million new stroke  
70 events occur annually<sup>1</sup>. Stroke is the second most prevalent cause of death and the third most  
71 significant contributor to disability-adjusted life years worldwide<sup>2</sup>. Stroke can have a  
72 significant impact on both physical and cognitive abilities<sup>3</sup>, resulting in coordination and  
73 balance impairments<sup>4</sup>. Muscle weakness, immobility, and dependency following stroke can  
74 also lead to physical impairment associated with decreased quality of life and higher  
75 mortality<sup>5</sup>. Moreover, stroke survivors face an elevated risk of falls<sup>6</sup>.

76           Although these factors suggest that stroke survivors are at increased risk of fractures,  
77 previous studies reported heterogeneous results (**Table S1**)<sup>7-17</sup>. For example, hip fracture risk  
78 in stroke survivors compared to a non-stroke group varied across studies, with reported  
79 relative risk (RR) of 1.4 to 2.4 in a Taiwanese study<sup>12</sup>, RR 11.75 in a Swedish study<sup>13</sup>, and no  
80 evidence of increased risk in a US study (adjusted hazard ratio [aHR] 1.1, 95% confidence  
81 interval [CI] 0.6-2.1)<sup>17</sup>. In addition, previous studies primarily focused on hip<sup>9,12,13,15,16</sup> or  
82 overall fractures<sup>7,9,13</sup>, and direct comparisons among different fracture sites were rarely  
83 reported<sup>7,11</sup>. The influence of severity of disability on fracture risk remains uncertain. A US  
84 study<sup>9</sup> found that post-stroke women with severe disability were at increased risk of hip  
85 fractures (aHR 2.1, 95% CI 1.4-3.2), but a Taiwanese study<sup>7</sup> showed an inverse relationship  
86 between stroke severity and overall fracture (aHR for moderate vs mild stroke, 0.88; 95% CI  
87 0.81-0.96, aHR for severe vs mild stroke, 0.39; 95% CI 0.34-0.44). The effect of stroke type  
88 on fracture risk has also been inconsistent; some studies indicated a higher fracture risk in  
89 hemorrhagic stroke compared to ischemic stroke<sup>18,19</sup>, but others reported no significant  
90 difference<sup>7</sup>. Moreover, most studies on fracture among stroke survivors failed to differentiate  
91 by stroke type<sup>8,12,14-17</sup>.

92 In this retrospective cohort study, we aimed to investigate the risk of fractures  
93 among stroke survivors compared to a non-stroke population. We also investigated the  
94 impacts of post-stroke disability and stroke type on fracture at various sites. We hypothesized  
95 that stroke survivors would have a higher risk of fractures compared to the control group,  
96 with the risk varying by fracture site and type of stroke. Additionally, we expected that the  
97 severity of post-stroke disability would correlate with an increased fracture risk.

98

99

## 100 **Methods**

### 101 **1. Data source**

102 This study used the Korean National Health Insurance Service (KNHIS) database,  
103 which includes diagnoses and prescriptions for the entire Korean population<sup>20</sup> (further details  
104 in **Supplementary Methods**). Under the KNHIS, employees and all people aged 40 or above  
105 are eligible for general health screening programs<sup>21</sup>. The KNHIS hence collects and manages  
106 information on demographic factors, anthropometric measurements, health behaviors, and  
107 laboratory results<sup>20</sup>. This database is a valuable resource for clinical and public health  
108 research<sup>21</sup>.

109

### 110 **2. Study population**

111 We identified a total of 800,646 individuals who experienced a stroke between  
112 January 1, 2010, and December 31, 2018. The definition of stroke was determined by ICD-10  
113 codes (**Table S2**) from hospitalization records, along with the presence of claims for brain

114 resonance imaging or brain CT scan<sup>22</sup>. We matched stroke survivors with a comparison group  
115 who had no previous stroke event in a 1:1 ratio based on age and sex. The control subjects  
116 were assigned an index date, which aligned with the date of stroke diagnosis for their  
117 respective matched patients.

118         Among the selected stroke (n=800,646) and comparison (n=800,646) groups, we  
119 included those who underwent a national health check-up within two years of the index year  
120 (n=465,257 and n=391,878) to retrieve baseline information on health behaviors and  
121 comorbidities. We excluded individuals who were younger than 40 years (n=6,719 and  
122 n=8,300) to analyze a population at risk for fractures, our outcome of interest. We also  
123 excluded participants with a previous diagnosis of fracture (n=62,858 and 59,785) or missing  
124 data on covariates (n=13,036 and 13,713) and applied a 1-year lag (n=29,418 and 4,809). The  
125 1-year lag was introduced to examine the risk of fracture after the stroke has stabilized and to  
126 exclude fractures that may occur during the acute stroke phase. In total, 223,358 were  
127 included in the stroke group and 322,161 in the comparison group (**Figure 1**). This study was  
128 approved by the Institutional Review Board of Samsung Medical Center (IRB No. 2020-12-  
129 068).

130

### 131 **3. Definition of disability and its severity caused by stroke**

132         We used data from Korea's National Disability Registration System (KNDRS) to  
133 determine post-stroke disability status and severity (further details in **Supplementary**  
134 **Methods**). Disability status and severity information from the KNDRS can be considered  
135 reliable and accurate. Grade 1 (most severe) disability from brain injury was defined by the  
136 requirement of total assistance from others, whereas grade 6 (least severe) disability was

137 defined by the performance of ordinary activities independently according to predefined  
138 eligibility criteria (**Table S3**)<sup>23</sup>. For the analyses, we classified grades 1 to 3 as severe  
139 disability and grades 4 to 6 as mild disability.

140

#### 141 **4. Study outcomes and follow-up**

142 The primary outcome of this study was a newly diagnosed fracture, determined by  
143 ICD-10 codes<sup>24</sup> (**Table S4**). Hip fracture was defined with the relevant diagnosis codes;  
144 vertebral and other fractures were defined by two or more outpatient visits with the relevant  
145 diagnosis codes within a 12-month period. “Overall fracture” refers to the occurrence of at  
146 least one of the above-mentioned fractures. The study population was followed until the  
147 occurrence of a new fracture, censor date, or the end of the study period (December 31, 2018),  
148 whichever came first.

149

#### 150 **5. Covariates**

151 Sociodemographic information such as age, sex, residential area, and income level  
152 was obtained from the KNHIS database. Data on lifestyle behaviors (smoking, alcohol  
153 consumption, and physical activity), anthropometric measurements, and laboratory test  
154 results were extracted from the general health screening examinations.

155 Comorbidities of the participants were identified using claims and prescription  
156 information prior to the index date (further details in **Supplementary Methods**).

157



## 158 **6. Statistical analysis**

159 Descriptive analysis was conducted using mean  $\pm$  standard deviation (SD) for  
160 continuous variables and number (percentage) for categorical variables. Cox proportional  
161 hazards regression analysis was performed to calculate the hazard ratio (HR) and 95% CI for  
162 fracture risk among stroke survivors compared to the matched comparison group, with  
163 adjustment for potential confounders during years of follow-up. Model 1 was unadjusted, and  
164 model 2 was adjusted for age (continuous), sex, area of residence (urban, rural), insulin use,  
165 diabetes mellitus (DM), hypertension, dyslipidemia, smoking (none, ex, current), alcohol  
166 consumption (non, mild, heavy), and body mass index (BMI) (continuous). In addition,  
167 individuals with stroke were categorized into three groups: (1) stroke without disability, (2)  
168 stroke with mild disability (grades 4–6), and (3) stroke with severe disability (grades 1–3).  
169 We conducted Kaplan-Meier analyses to demonstrate the cumulative incidence probabilities  
170 of fracture.

171 All statistical analyses were conducted using SAS version 9.4 (SAS Institute Inc.,  
172 Cary, NC, USA). Two-sided P-values  $<0.05$  were considered statistically significant.

173

174

## 175 **Results**

### 176 **1. Baseline characteristics**

177 Among 223,358 stroke survivors, the mean age was  $64.8 \pm 10.9$  years, and 61.2%  
178 were male (**Table 1**). Stroke survivors were more likely to reside in rural areas and had lower  
179 incomes than the control group. Compared to the control group, a higher percentage of stroke

180 survivors were current smokers (26.1% versus 17.6%), heavy drinkers (8.3% versus 6.7%),  
181 and had a higher BMI. Stroke survivors were more likely to have higher Charlson  
182 Comorbidity Index scores, and a higher prevalence of DM, hypertension, and dyslipidemia.

183 Among 26,932 stroke survivors with post-stroke disability, the mean age was  $66.5 \pm$   
184  $10.0$  years, and 64.0% were male. Stroke survivors with post-stroke disability had lower  
185 incomes and a higher BMI than those without post-stroke disability. Stroke survivors with  
186 disability had higher Charlson Comorbidity Index scores than those without post-stroke  
187 disability, and a higher prevalence of DM and hypertension.

188

## 189 **2. Risk of subsequent fracture among people with stroke according to post-stroke** 190 **disability**

191 The mean  $\pm$  SD follow-up period for stroke survivors was  $3.7 \pm 2.5$  years, with an  
192 average  $2.7 \pm 2.0$  years between stroke and new-onset fracture. The comparison group had a  
193 mean  $\pm$  SD follow-up period of  $4.2 \pm 2.5$  years. The Kaplan-Meier curves are shown in  
194 **Figure 2**.

195 Stroke survivors had a higher risk of overall fracture (aHR 1.40, 95% CI 1.37-1.43)  
196 than the comparison group after adjusting for potential confounders (**Table 2**). Stroke  
197 survivors with post-stroke disability had an increased risk of overall fractures (aHR 1.69, 95%  
198 CI 1.62-1.76). Stroke survivors without post-stroke disability also had a higher risk of overall  
199 fractures compared to the comparison group (aHR 1.36, 95% CI 1.33-1.39).

200 Stroke survivors exhibited a higher risk of vertebral fracture (aHR 1.29, 95% CI  
201 1.25-1.34) compared to the comparison group (**Table 2**). There was a slight difference in

202 vertebral fracture risk by post-stroke disability status (aHR 1.39, 95% CI 1.29-1.48 vs. aHR  
203 1.28, 95% CI 1.24-1.33). Furthermore, among post-stroke disability, those with mild  
204 disability had a higher risk of vertebral fracture (aHR 1.48, 95% CI 1.36-1.60) compared to  
205 those with severe disability (aHR 1.19, 95% CI 1.05-1.35).

206 Stroke survivors had a higher risk of hip fracture (aHR 2.42, 95% CI 2.30-2.55)  
207 compared to the comparison group. Furthermore, stroke survivors with post-stroke disability  
208 had an even greater risk of hip fracture (aHR 3.83, 95% CI 3.54-4.15) compared to those  
209 without post-stroke disability (aHR 2.22, 95% CI 2.10-2.35). Moreover, those with severe  
210 disability had a significantly higher risk of hip fracture (aHR 4.82, 95% CI 4.28-5.42)  
211 compared to those with mild post-stroke disability (aHR 3.38, 95% CI 3.06-3.73).

212

### 213 **3. Fracture risk according to type of stroke**

214 We compared the risk of fracture between ischemic and hemorrhagic stroke after  
215 stratifying by post-stroke disability status (**Table 3**). No significant difference was found in  
216 the risk of overall fracture between the ischemic and hemorrhagic types: 1.36 (1.33-1.40) vs.  
217 1.33 (1.28-1.39) in survivors without post-stroke disability and 1.67 (1.59–1.75) vs. 1.76  
218 (1.62-1.92) with post-stroke disability. However, the risk for vertebral fractures was higher in  
219 ischemic stroke survivors compared to hemorrhagic stroke survivors in both strata: without  
220 disability (aHR 1.32, 95% CI 1.27-1.36; aHR 1.14, 95% CI 1.07-1.22, respectively) and with  
221 disability (aHR 1.46, 95% CI 1.35-1.57; aHR 1.13, 95% CI 0.97-1.33, respectively). The risk  
222 of hip fracture was higher for hemorrhagic stroke survivors than ischemic stroke survivors in  
223 only those with post-stroke disability (aHR 5.34, 95% CI 4.62-6.16; aHR 3.48, 95% CI 3.18-  
224 3.81, respectively).

225

226

## 227 **Discussion**

228           In our large-scale study, stroke survivors had a 1.40 times increased risk of overall  
229 fracture compared to the comparison group after adjusting for potential confounders. Among  
230 the fracture sites, hip fractures showed the largest risk among stroke survivors (2.42 times)  
231 compared to vertebral or other fractures (1.29 and 1.19 times). Stroke survivors with post-  
232 stroke disability showed a higher risk than those who did not have post-stroke disability, and  
233 severe disability was associated with an even higher hip fracture risk (4.82 times). There was  
234 no difference in fracture risk between ischemic and hemorrhagic stroke when post-stroke  
235 disability status was accounted for, except for vertebral fractures which showed higher risk in  
236 ischemic stroke survivors.

237           The increased risk of fractures in stroke survivors can be attributed to decreased  
238 bone mineral density (BMD) and increased susceptibility to falls following stroke. Bone loss  
239 after stroke is presumed to be primarily due to immobilization and increased bone turnover.  
240 When the skeleton is not subjected to enough mechanical loading, osteoblast activity  
241 decreases, leading to reduced bone synthesis<sup>25</sup>. In a previous study, BMD in the paretic lower  
242 limb decreased by 10% among non-ambulatory patients, but only 3% among ambulatory  
243 patients<sup>26</sup>. Stroke survivors, even those with mild symptoms are reported to have reduced  
244 physical activity<sup>27</sup>. Post-stroke falls typically occur during mobilization<sup>28</sup>, and stroke  
245 survivors face an increased risk during basic activities like transferring to and from the bed,  
246 chair, and toilet<sup>29</sup>.

247           Our study found that stroke survivors had a higher risk of both hip and vertebral

248 fractures compared to the control group, but the risk was higher for hip vs. vertebral fracture.  
249 As most hip fracture are caused by falls<sup>30</sup>, the increased occurrence of hip fractures in the  
250 stroke group could potentially be attributed to falls resulting from diminished balance<sup>6</sup>. Also,  
251 the decreased mobility observed in stroke patients may lead to decreased BMD in the hip and  
252 subsequent increase in hip fracture risk because the hip bone is particularly sensitive to  
253 weight-bearing<sup>26</sup>. In contrast, vertebral fractures are commonly associated with osteoporosis  
254 (i.e. compression fracture)<sup>31</sup> but less frequently associated with falls compared to hip  
255 fractures<sup>32</sup>.

256         Prior studies have shown that there is a significant loss of total body BMD,  
257 including hip, but not in vertebrae after a severe stroke<sup>33</sup>. This may be because those with  
258 severe disability spend a significant amount of time lying down<sup>5</sup>, leading to reduced weight-  
259 bearing activity, which can contribute to greater hip BMD loss<sup>26</sup>. Meanwhile, those with mild  
260 disability are able to perform daily activities independently and may require only occasional  
261 assistance from others<sup>23</sup>; hence, they have a relatively lower risk of falls and are likely to  
262 remain active, and thus are at higher risk of vertebral fractures, which are attributed more to  
263 osteoporosis compared to hip fractures<sup>31</sup>. In addition, vertebral fractures were identified  
264 through claims data in our study, requiring visit to a hospital. Stroke survivors with mild  
265 disability may be more susceptible to experiencing vertebral fracture symptoms compared to  
266 those with severe disability, and make hospital visits to investigate the cause and be  
267 diagnosed with vertebral fractures. In contrast, stroke survivors with severe disability who  
268 have limited access to health care may be less likely to seek medical care for minor injuries  
269 such as vertebral fractures. People with functional or mental disabilities have difficulty  
270 accessing healthcare<sup>34</sup>.

271           There was no significant difference in the overall fracture risk between ischemic and  
272 hemorrhagic stroke. This is consistent with the results of a recent longitudinal study in  
273 Taiwan, which reported that the overall fracture risk did not differ between ischemic and  
274 hemorrhagic stroke as the reference (aHR 1.08, 95% CI 0.92-1.16)<sup>7</sup>. However, when  
275 assessing site-specific fractures, the risk of vertebral fracture was slightly higher in ischemic  
276 stroke survivors with post-stroke disability and without post-stroke disability, while the risk  
277 of hip fracture was higher in hemorrhagic stroke survivors with post-stroke disability. This  
278 finding aligns with a Taiwanese study, where hemorrhagic stroke was associated with higher  
279 risk of hip fracture (aHR 2.34, 95% CI 1.33-4.11) compared with ischemic stroke (aHR 1.60,  
280 95% CI 1.36-1.89)<sup>18</sup>. The underlying reasons for these differential risks of vertebral and hip  
281 fractures in ischemic and hemorrhagic stroke survivors remain unclear. However, previous  
282 research suggests that, compared with ischemic stroke, hemorrhagic strokes are more severe<sup>35</sup>,  
283 and thus greater impaired motor function and bone loss due to immobilization may account  
284 for the higher risk of hip fracture in hemorrhagic stroke with post-stroke disability<sup>18</sup>.

285           Our study has important clinical implications. Delayed rehabilitation of stroke  
286 survivors is a risk factor for fracture<sup>36</sup>. Moreover, fractures can result in further functional  
287 decline, disrupt stroke rehabilitation, and elevate the risk of subsequent stroke<sup>37,38</sup>. The  
288 American Heart Association/American Stroke Association and guidelines for adult stroke  
289 rehabilitation and recovery recommend a formal fall prevention program during  
290 hospitalization for stroke survivors, and that stroke patients discharged to the community  
291 participate in exercise programs with balance training to reduce falls<sup>39</sup>. A previous study  
292 demonstrated reduced fracture risk with regular exercise following acute stroke<sup>40</sup>. In addition,  
293 it is necessary to conduct examinations and implement preventive treatments for increased  
294 bone resorption, which appears to play a significant role in osteoporosis among patients who

295 have experienced prolonged bedridden periods due to immobility<sup>41</sup>. Our study findings  
296 highlight the importance of fracture risk prevention among stroke survivors, which may be  
297 accomplished by not only fall risk assessments, exercise, and balance training programs<sup>39</sup>, but  
298 also by supplementation of calcium and vitamin D<sup>42</sup> and osteoporosis medications<sup>43</sup>.

299 This study possesses several strengths, including the utilization of a representative  
300 sample obtained from a national database. The substantial number of stroke cases enabled a  
301 comprehensive examination of the impact of stroke severity, an aspect often overlooked in  
302 prior research. Moreover, stroke severity was defined using a disability grade determined by  
303 the Modified Barthel Index, which was validated by specialists. Additionally, the availability  
304 of diverse demographic and clinical information facilitated adjustment for confounders in our  
305 Cox regression analysis, enhancing the robustness of our findings.

306 Despite the strength and clinical implication of our study, there are certain  
307 limitations to acknowledge. First, the analysis did not consider the specific lesion site of  
308 stroke as the ICD-10 codes or KNDRS used in this study do not distinguish different lesion  
309 sites. Stroke location affects clinical outcomes<sup>44</sup>, and future studies should identify the  
310 specific lesion site to help identify stroke survivors more vulnerable to fracture risk. Second,  
311 given that the definition of fractures relied on claims data using ICD-10 codes, there is a  
312 possibility of under detection of fractures, especially for vertebral fractures. Third, because  
313 we used an established public database, we were unable to analyze several factors, including  
314 the cause of fractures, family history of fracture, BMD, balance or cognitive impairment, or  
315 antithrombotic medication status, which may affect fracture risk. Future research should  
316 focus on identifying the impact of these factors on fracture risk among stroke survivors.  
317 Furthermore, our study participants were restricted to those who received health screening

318 examinations, potentially representing a cohort that is healthier and more engaged in healthy  
319 lifestyles compared to the general population. Finally, the use of a single-country database  
320 limits the generalizability of our study to other populations due to differences in medical  
321 treatment approaches that may differ by local practice guidelines and healthcare systems,  
322 cultural environments, and ethnicity<sup>45</sup>.

323           In summary, our study showed that stroke survivors had a 1.4-fold increased risk of  
324 overall fracture and a 2.4-fold increased risk of hip fracture. These risks were further elevated  
325 among individuals with post-stroke disability. When stratifying by post-stroke disability  
326 status, no significant difference was observed between ischemic and hemorrhagic stroke for  
327 overall fracture risk. Fall prevention and comprehensive bone health management should be  
328 prioritized in the care of stroke survivors.

329

330

331



332 **Acknowledgements**

333 The authors thank Da-Hyeun Lee and Sang-Eun Lee for the graphical abstract.

334

335 **Funding**

336 None

337

338 **Conflicts of interest**

339 The authors have no relevant conflicts of interest to declare.

340

341 **Author contributions**

342 D.L. drafted and revised the article. I.Y.C. and D.W.S. interpreted the data and contributed to  
343 the study conception and design. K.H. was involved in data acquisition and statistical analysis.

344 W.H.C., J.E.Y., H.L.C., and J.H.P. revised manuscript. All authors read and agreed to the final  
345 manuscript.

346

347 **Data Availability Statement**

348 The KNHIS database is open to researchers whose study protocols are approved by the  
349 official review committee.

350

351 **Supplemental Material**

352 Supplementary Methods

353 Tables S1-S4

354

355

## 356 **References**

- 357 1. Feigin VL, Brainin M, Norrving B, Martins S, Sacco RL, Hacke W, Fisher M, Pandian J,  
358 Lindsay P. World Stroke Organization (WSO): global stroke fact sheet 2022. *International*  
359 *Journal of Stroke*. 2022;17:18-29.
- 360 2. Feigin VL, Stark BA, Johnson CO, Roth GA, Bisignano C, Abady GG, Abbasifard M, Abbasi-  
361 Kangevari M, Abd-Allah F, Abedi V. Global, regional, and national burden of stroke and its  
362 risk factors, 1990–2019: a systematic analysis for the Global Burden of Disease Study 2019.  
363 *The Lancet Neurology*. 2021;20:795-820.
- 364 3. Viktorisson A, Andersson EM, Lundström E, Sunnerhagen KS. Levels of physical activity  
365 before and after stroke in relation to early cognitive function. *Scientific Reports*. 2021;11:1-  
366 7.
- 367 4. Han P, Zhang W, Kang L, Ma Y, Fu L, Jia L, Yu H, Chen X, Hou L, Wang L. Clinical evidence  
368 of exercise benefits for stroke. *Exercise for Cardiovascular Disease Prevention and*  
369 *Treatment: From Molecular to Clinical, Part 2*. 2017:131-151.
- 370 5. Dalvandi A, Heikkilä K, Maddah S, Khankeh H, Ekman S-L. Life experiences after stroke  
371 among Iranian stroke survivors. *International nursing review*. 2010;57:247-253.
- 372 6. Dennis M, Lo K, McDowall M, West T. Fractures after stroke: frequency, types, and  
373 associations. *Stroke*. 2002;33:728-734.
- 374 7. Wang H-P, Sung S-F, Yang H-Y, Huang W-T, Hsieh C-Y. Associations between stroke type,  
375 stroke severity, and pre-stroke osteoporosis with the risk of post-stroke fracture: A  
376 nationwide population-based study. *Journal of the Neurological Sciences*. 2021;427:117512.
- 377 8. Tanislav C, Kostev K. Factors associated with fracture after stroke and TIA: a long-term  
378 follow-up. *Osteoporosis International*. 2020;31:2395-2402.
- 379 9. Northuis CA, Crandall CJ, Margolis KL, Diem SJ, Ensrud KE, Lakshminarayan K. Association  
380 between post-stroke disability and 5-year hip-fracture risk: The Women's Health Initiative.  
381 *Journal of Stroke and Cerebrovascular Diseases*. 2020;29:104976.
- 382 10. Kapral MK, Fang J, Alibhai SM, Cram P, Cheung AM, Casaubon LK, Prager M, Stamplecoski  
383 M, Rashkovan B, Austin PC. Risk of fractures after stroke: results from the Ontario Stroke  
384 Registry. *Neurology*. 2017;88:57-64.
- 385 11. Benzinger P, Rapp K, König H, Bleibler F, Globas C, Beyersmann J, Jaensch A, Becker C,  
386 Büchele G. Risk of osteoporotic fractures following stroke in older persons. *Osteoporosis*  
387 *International*. 2015;26:1341-1349.
- 388 12. Lin HL, Lin HC, Tseng YF, Liao HH, Worly J, Pan CY, Hsu CY. Hip fracture after first-ever  
389 stroke: a population-based study. *Acta Neurologica Scandinavica*. 2015;131:158-163.
- 390 13. Sannerby U, Melhus H, Gedeberg R, Byberg L, Garmo H, Ahlbom A, Pedersen NL,  
391 Michaëlsson K. Cardiovascular diseases and risk of hip fracture. *Jama*. 2009;302:1666-1673.
- 392 14. Brown DL, Morgenstern LB, Majersik JJ, Kleerekoper M, Lisabeth LD. Risk of fractures after

- 393 stroke. *Cerebrovascular Diseases*. 2008;25:95-99.
- 394 15. Kanis J, Oden A, Johnell O. Acute and long-term increase in fracture risk after  
395 hospitalization for stroke. *Stroke*. 2001;32:702-706.
- 396 16. Ramnemark A, Nyberg L, Borssén B, Olsson T, Gustafson Y. Fractures after stroke.  
397 *Osteoporosis International*. 1998;8:92-95.
- 398 17. Melton Iii L, Brown Jr R, Achenbach S, O'Fallon W, Whisnant J, Whisnant J. Long-term  
399 fracture risk following ischemic stroke: a population-based study. *Osteoporosis*  
400 *international*. 2001;12:980-986.
- 401 18. Zheng J-Q, Lai H-J, Zheng C-M, Yen Y-C, Lu K-C, Hu C-J, Lee H-H, Wang Y-H. Association  
402 of stroke subtypes with risk of hip fracture: a population-based study in Taiwan. *Archives*  
403 *of osteoporosis*. 2017;12:1-8.
- 404 19. Lisabeth LD, Morgenstern LB, Wing JJ, Sanchez BN, Zahuranec DB, Skolarus LE, Burke JF,  
405 Kleerekoper M, Smith MA, Brown DL. Poststroke fractures in a bi-ethnic community.  
406 *Journal of Stroke and Cerebrovascular Diseases*. 2012;21:471-477.
- 407 20. Cheol Seong S, Kim Y-Y, Khang Y-H, Heon Park J, Kang H-J, Lee H, Do C-H, Song J-S,  
408 Hyon Bang J, Ha S. Data resource profile: the national health information database of the  
409 National Health Insurance Service in South Korea. *International journal of epidemiology*.  
410 2017;46:799-800.
- 411 21. Shin DW, Cho J, Park JH, Cho B. National General Health Screening Program in Korea:  
412 history, current status, and future direction. *Precision and Future Medicine*. 2022;6:9-31.
- 413 22. Jeong S-M, Lee HR, Han K, Jeon KH, Kim D, Yoo JE, Cho MH, Chun S, Lee SP, Nam K-W.  
414 Association of change in alcohol consumption with risk of ischemic stroke. *Stroke*.  
415 2022;53:2488-2496.
- 416 23. Kim M, Jung W, Kim SY, Park JH, Shin DW. The Korea National Disability Registration  
417 System. *Epidemiology and Health*. 2023:e2023053.
- 418 24. Yoo JE, Shin DW, Han K, Kim D, Yoon JW, Lee D-Y. Association of female reproductive  
419 factors with incidence of fracture among postmenopausal women in Korea. *JAMA network*  
420 *open*. 2021;4:e2030405-e2030405.
- 421 25. Yuan Y, Chen X, Zhang L, Wu J, Guo J, Zou D, Chen B, Sun Z, Shen C, Zou J. The roles of  
422 exercise in bone remodeling and in prevention and treatment of osteoporosis. *Progress in*  
423 *Biophysics and Molecular Biology*. 2016;122:122-130.
- 424 26. Jørgensen L, Jacobsen B, Wilsgaard T, Magnus J. Walking after stroke: does it matter?  
425 Changes in bone mineral density within the first 12 months after stroke. A longitudinal  
426 study. *Osteoporosis international*. 2000;11:381-387.
- 427 27. Hildebrand M, Brewer M, Wolf T. The impact of mild stroke on participation in physical  
428 fitness activities. *Stroke research and treatment*. 2012;2012.
- 429 28. Chaiwanichsiri D, Jiamworakul A, Kitisomprayoonkul W. Falls among stroke patients in Thai  
430 Red Cross rehabilitation center. *Journal of the Medical Association of Thailand*

- 431 *Chotmaihet Thangphaet*. 2006;89:S47-52.
- 432 29. Wada N, Sohmiya M, Shimizu T, Okamoto K, Shirakura K. Clinical analysis of risk factors for  
433 falls in home-living stroke patients using functional evaluation tools. *Archives of physical*  
434 *medicine and rehabilitation*. 2007;88:1601-1605.
- 435 30. LeBlanc KE, Muncie Jr HL, LeBlanc LL. Hip fracture: diagnosis, treatment, and secondary  
436 prevention. *American family physician*. 2014;89:945-951.
- 437 31. Genant HK, Cooper C, Poor G, Reid I, Ehrlich G, Kanis J, Nordin BC, Barrett-Connor E, Black  
438 D, Bonjour J. Interim report and recommendations of the World Health Organization task-  
439 force for osteoporosis. *Osteoporosis international*. 1999;10:259.
- 440 32. Vieira ER, Palmer RC, Chaves PH. Prevention of falls in older people living in the  
441 community. *Bmj*. 2016;353.
- 442 33. Ramnemark A, Nyberg L, Lorentzon R, Englund U, Gustafson Y. Progressive  
443 hemiosteoporosis on the paretic side and increased bone mineral density in the  
444 nonparetic arm the first year after severe stroke. *Osteoporosis International*. 1999;9:269-  
445 275.
- 446 34. Krahn GL, Walker DK, Correa-De-Araujo R. Persons with disabilities as an unrecognized  
447 health disparity population. *American journal of public health*. 2015;105:S198-S206.
- 448 35. Andersen KK, Olsen TS, Dehlendorff C, Kammergaard LP. Hemorrhagic and ischemic  
449 strokes compared: stroke severity, mortality, and risk factors. *Stroke*. 2009;40:2068-2072.
- 450 36. Waring J, Bishop S, Marshall F. A qualitative study of professional and carer perceptions of  
451 the threats to safe hospital discharge for stroke and hip fracture patients in the English  
452 National Health Service. *BMC health services research*. 2016;16:1-14.
- 453 37. Huo K, Hashim SI, Yong KL, Su H, Qu Q-M. Impact and risk factors of post-stroke bone  
454 fracture. *World journal of experimental medicine*. 2016;6:1.
- 455 38. Lamo-Espinosa JM, Mariscal G, Gómez-Álvarez J, San-Julián M. Incidence and risk factors  
456 for stroke after hip fracture: a meta-analysis. *Scientific Reports*. 2023;13:17618.
- 457 39. Tsao CW, Aday AW, Almarzooq ZI, Alonso A, Beaton AZ, Bittencourt MS, Boehme AK,  
458 Buxton AE, Carson AP, Commodore-Mensah Y. Heart disease and stroke statistics—2022  
459 update: a report from the American Heart Association. *Circulation*. 2022;145:e153-e639.
- 460 40. Cheon Dy, Han K-D, Lee JH, Yu K-H, Choi BY, Lee M. Impact of changes in physical activity  
461 and incident fracture after acute ischemic stroke. *Scientific Reports*. 2023;13:16715.
- 462 41. Eimori K, Endo N, Uchiyama S, Takahashi Y, Kawashima H, Watanabe K. Disrupted bone  
463 metabolism in long-term bedridden patients. *PLoS One*. 2016;11:e0156991.
- 464 42. Gittler M, Davis AM. Guidelines for adult stroke rehabilitation and recovery. *Jama*.  
465 2018;319:820-821.
- 466 43. Poole KE, Loveridge N, Rose CM, Warburton EA, Reeve J. A single infusion of zoledronate  
467 prevents bone loss after stroke. *Stroke*. 2007;38:1519-1525.
- 468 44. Cheng B, Forkert ND, Zavaglia M, Hilgetag CC, Golsari A, Siemonsen S, Fiehler J, Pedraza S,

- 469 Puig J, Cho T-H. Influence of stroke infarct location on functional outcome measured by  
470 the modified rankin scale. *Stroke*. 2014;45:1695-1702.
- 471 45. Cauley JA. Defining ethnic and racial differences in osteoporosis and fragility fractures.  
472 *Clinical Orthopaedics and Related Research®*. 2011;469:1891-1899.
- 473
- 474

475 **Figure Legends**

476 Figure 1. Flowchart of the study population

477

478 Figure 2. Kaplan-Meier curves displaying the estimated incidence probability of overall

479 fracture

480 A, Risk of overall fracture in stroke survivors and control group; B, Risk of overall fracture in

481 stroke by severity of disability

482

483 **Table 1.** Baseline characteristics of the study population

|                                    | Study population                 |                                  |         | Stroke survivors                                  |                                               |         |
|------------------------------------|----------------------------------|----------------------------------|---------|---------------------------------------------------|-----------------------------------------------|---------|
|                                    | Matched controls<br>(N= 322,161) | Stroke survivors<br>(N= 223,358) | P-value | Without post-stroke<br>disability<br>(N= 196,426) | With post-stroke<br>disability<br>(N= 26,932) | P-value |
| Mean age, years                    | 65.2 ± 11.2                      | 64.8 ± 10.9                      | <0.001  | 64.6 ± 11.0                                       | 66.5 ± 10.0                                   | <0.001  |
| Sex, male                          | 197,357 (61.3)                   | 136,623 (61.2)                   | 0.5     | 19,400 (60.8)                                     | 17,223 (64.0)                                 | <0.001  |
| Smoking                            |                                  |                                  | <0.001  |                                                   |                                               | <0.001  |
| Non-smoker                         | 192,161 (59.7)                   | 124,483 (55.7)                   |         | 109,232 (55.6)                                    | 15,251 (56.6)                                 |         |
| Ex-smoker                          | 73,321 (22.8)                    | 40,633 (18.2)                    |         | 35,687 (18.2)                                     | 4,946 (18.4)                                  |         |
| Current smoker                     | 56,679 (17.6)                    | 58,242 (26.1)                    |         | 51,507 (26.2)                                     | 6,735 (25.0)                                  |         |
| Alcohol consumption                |                                  |                                  | <0.001  |                                                   |                                               | <0.001  |
| Non                                | 198,336 (61.6)                   | 136,167 (61.0)                   |         | 118,718 (60.4)                                    | 17,449 (64.8)                                 |         |
| Mild                               | 102,170 (31.7)                   | 68,701 (30.8)                    |         | 61,347 (31.2)                                     | 7,354 (27.3)                                  |         |
| Heavy                              | 21,655 (6.7)                     | 18,490 (8.3)                     |         | 51,507 (26.2)                                     | 6,735 (25.0)                                  |         |
| Regular physical activity          | 72,905 (22.6)                    | 42,941 (19.2)                    | <0.001  | 38,147 (19.42)                                    | 4,794 (17.8)                                  | <0.001  |
| Anthropometrics                    |                                  |                                  |         |                                                   |                                               |         |
| Body mass index, kg/m <sup>2</sup> | 24.1 ± 3.1                       | 24.3 ± 3.2                       | <0.001  | 24.3 ± 3.1                                        | 24.6 ± 3.3                                    | <0.001  |
| Waist circumference, cm            | 83.1 ± 8.5                       | 84.0 ± 8.6                       | <0.001  | 83.8 ± 8.6                                        | 85.1 ± 8.7                                    | <0.001  |
| Systolic BP, mmHg                  | 127.0 ± 15.3                     | 131.8 ± 17.4                     | <0.001  | 131.7 ± 17.34                                     | 132.5 ± 17.4                                  | <0.001  |
| Diastolic BP, mmHg                 | 77.3 ± 9.8                       | 80.2 ± 11.3                      | <0.001  | 80.2 ± 11.3                                       | 80.3 ± 11.2                                   | <0.001  |
| Comorbidity                        |                                  |                                  |         |                                                   |                                               |         |
| Hypertension                       | 164,380 (51.0)                   | 171,966 (77.0)                   | <0.001  | 149,710 (76.2)                                    | 22,256 (82.6)                                 | <0.001  |
| Diabetes Mellitus                  | 60,105 (18.7)                    | 67,565 (30.3)                    | <0.001  | 58,293 (29.7)                                     | 9,272 (34.4)                                  | <0.001  |
| Dyslipidemia                       | 114,553 (35.6)                   | 158,225 (70.8)                   | <0.001  | 139,603 (71.1)                                    | 18,622 (69.1)                                 | <0.001  |
| Laboratory findings                |                                  |                                  |         |                                                   |                                               |         |
| Glucose, fasting, mg/dL            | 103.8 ± 26.2                     | 110.6 ± 37.8                     | <0.001  | 110.4 ± 37.7                                      | 132.5 ± 17.4                                  | <0.001  |
| eGFR, mL/min/1.73 m <sup>2</sup>   | 85.0 ± 42.4                      | 83.7 ± 40.4                      | <0.001  | 83.8 ± 40.4                                       | 83.3 ± 40.4                                   | <0.001  |
| Total cholesterol, mg/dL           | 194.5 ± 38.3                     | 198.2 ± 40.8                     | <0.001  | 198.5 ± 40.8                                      | 195.8 ± 41.3                                  | <0.001  |
| Urban residency                    | 141,212 (43.8)                   | 89,610 (40.1)                    | <0.001  | 79,442 (40.4)                                     | 101,68 (37.7)                                 | <0.001  |
| Income of lowest 25%               | 61,013 (19.0)                    | 48,564 (21.7)                    | <0.001  | 41,902 (21.3)                                     | 6,662 (24.7)                                  | <0.001  |
| Charlson comorbidity index         | 1.8 ± 1.9                        | 4.3 ± 2.4                        | <0.001  | 4.3 ± 2.3                                         | 4.8 ± 2.5                                     | <0.001  |
| Follow-up duration, years          | 4.2 ± 2.5                        | 3.7 ± 2.5                        | <0.001  | 3.7 ± 2.5                                         | 3.7 ± 2.5                                     | <0.001  |

484 Data are expressed as mean ± standard deviation or number (%); BP, blood pressure; eGFR, estimated glomerular filtration rate.



485 **Table 2.** Fracture risks among stroke survivors compared to matched controls and according to post-stroke disability

|                               | Number  | Event number<br>(n) | IR per 1,000 person-<br>years | Model 1 (Crude)<br>HR (95% CI) | Model 2<br>aHR (95% CI) |
|-------------------------------|---------|---------------------|-------------------------------|--------------------------------|-------------------------|
| <b>Overall fracture</b>       |         |                     |                               |                                |                         |
| Matched comparison group      | 322,161 | 20,398              | 15.1                          | 1 (ref.)                       | 1 (ref.)                |
| Stroke survivors              | 223,358 | 16,344              | 19.7                          | 1.31 (1.28, 1.34)              | 1.40 (1.37, 1.43)       |
| No post-stroke disability     | 196,426 | 13,885              | 19.0                          | 1.27 (1.24, 1.30)              | 1.36 (1.33, 1.39)       |
| Post-stroke Disability        | 26,932  | 2,459               | 24.4                          | 1.63 (1.56, 1.70)              | 1.69 (1.62, 1.76)       |
| Mild post-stroke disability   | 17,544  | 1,659               | 24.8                          | 1.65 (1.57, 1.74)              | 1.67 (1.58, 1.75)       |
| Severe post-stroke disability | 9,388   | 800                 | 23.6                          | 1.57 (1.47, 1.69)              | 1.73 (1.61, 1.86)       |
| <b>Vertebral fracture</b>     |         |                     |                               |                                |                         |
| Matched comparison group      | 322,161 | 9,797               | 7.1                           | 1 (ref.)                       | 1 (ref.)                |
| Stroke survivors              | 223,358 | 6,952               | 8.1                           | 1.16 (1.12, 1.19)              | 1.29 (1.25, 1.34)       |
| No post-stroke disability     | 196,426 | 6,009               | 8.0                           | 1.14 (1.11, 1.18)              | 1.28 (1.24, 1.33)       |
| Post-stroke Disability        | 26,932  | 943                 | 9.0                           | 1.28 (1.20, 1.37)              | 1.39 (1.29, 1.48)       |
| Mild post-stroke disability   | 17,544  | 691                 | 9.9                           | 1.42 (1.31, 1.53)              | 1.48 (1.36, 1.60)       |
| Severe post-stroke disability | 9,388   | 252                 | 7.1                           | 1.01 (0.89, 1.15)              | 1.19 (1.05, 1.35)       |
| <b>Hip fracture</b>           |         |                     |                               |                                |                         |
| Matched comparison group      | 322,161 | 3,102               | 2.2                           | 1 (ref.)                       | 1 (ref.)                |
| Stroke survivors              | 223,358 | 4,027               | 4.7                           | 2.14 (2.04, 2.24)              | 2.42 (2.30, 2.55)       |
| No post-stroke disability     | 196,426 | 3,223               | 4.2                           | 1.95 (1.86, 2.05)              | 2.22 (2.10, 2.35)       |
| Post-stroke Disability        | 26,932  | 804                 | 7.6                           | 3.50 (3.23, 3.78)              | 3.83 (3.54, 4.15)       |
| Mild post-stroke disability   | 17,544  | 488                 | 7.0                           | 3.18 (2.89, 3.50)              | 3.38 (3.06, 3.73)       |
| Severe post-stroke disability | 9,388   | 316                 | 9.0                           | 4.13 (3.68, 4.64)              | 4.82 (4.28, 5.42)       |
| <b>Other fracture</b>         |         |                     |                               |                                |                         |
| Matched comparison group      | 322,161 | 8,933               | 6.5                           | 1 (ref.)                       | 1 (ref.)                |
| Stroke survivors              | 223,358 | 6,609               | 7.7                           | 1.20 (1.16, 1.24)              | 1.19 (1.15, 1.23)       |
| No post-stroke disability     | 196,426 | 5691                | 7.6                           | 1.17 (1.14, 1.21)              | 1.16 (1.12, 1.21)       |
| Post-stroke Disability        | 26,932  | 918                 | 8.8                           | 1.36 (1.27, 1.45)              | 1.36 (1.27, 1.45)       |

|                               |        |     |     |                   |                   |
|-------------------------------|--------|-----|-----|-------------------|-------------------|
| Mild post-stroke disability   | 17,544 | 635 | 9.1 | 1.42 (1.31, 1.53) | 1.39 (1.28, 1.51) |
| Severe post-stroke disability | 9,388  | 283 | 8.0 | 1.24 (1.10, 1.40) | 1.29 (1.14, 1.45) |

486 IR, incidence rate; HR, hazard ratio; CI, confidence interval

487 Model 2: adjusted for age, sex, area of residence, insulin, diabetes mellitus, hypertension, dyslipidemia, smoking, alcohol consumption, and body mass index

488

489 **Table 3.** Fracture risks among stroke survivors compared to matched controls and according to type of stroke

|                                                 | Number  | Event number<br>(n) | IR per 1,000 person-<br>years | Model 1 (Crude)<br>HR (95% CI) | Model 2<br>aHR (95% CI) |
|-------------------------------------------------|---------|---------------------|-------------------------------|--------------------------------|-------------------------|
| Overall fracture                                |         |                     |                               |                                |                         |
| Matched comparison group                        | 322,161 | 20,398              | 15.1                          | 1 (ref.)                       | 1 (ref.)                |
| Stroke survivors without post-stroke disability |         |                     |                               |                                |                         |
| Hemorrhagic                                     | 40,875  | 2,554               | 16.6                          | 1.10 (1.06, 1.15)              | 1.33 (1.28, 1.39)       |
| Ischemic                                        | 155,551 | 11,331              | 19.7                          | 1.31 (1.28, 1.34)              | 1.36 (1.33, 1.40)       |
| Stroke survivors with post-stroke disability    |         |                     |                               |                                |                         |
| Hemorrhagic                                     | 6,475   | 553                 | 22.7                          | 1.5 (1.39, 1.64)               | 1.76 (1.62, 1.92)       |
| Ischemic                                        | 20,457  | 1,906               | 25.0                          | 1.66 (1.59, 1.74)              | 1.67 (1.59, 1.75)       |
| Vertebral fracture                              |         |                     |                               |                                |                         |
| Matched comparison group                        | 322,161 | 9,797               | 7.1                           | 1 (ref.)                       | 1 (ref.)                |
| Stroke survivors without post-stroke disability |         |                     |                               |                                |                         |
| Hemorrhagic                                     | 40,875  | 955                 | 6.0                           | 0.86 (0.80, 0.92)              | 1.14 (1.07, 1.22)       |
| Ischemic                                        | 155,551 | 5,054               | 8.5                           | 1.22 (1.18, 1.26)              | 1.32 (1.27, 1.36)       |
| Stroke survivors with post-stroke disability    |         |                     |                               |                                |                         |
| Hemorrhagic                                     | 6,475   | 159                 | 6.2                           | 0.89 (0.76, 1.04)              | 1.13 (0.97, 1.33)       |
| Ischemic                                        | 20,457  | 784                 | 10.0                          | 1.41 (1.31, 1.51)              | 1.46 (1.35, 1.57)       |
| Hip fracture                                    |         |                     |                               |                                |                         |
| Matched comparison group                        | 322,161 | 3,102               | 2.2                           | 1 (ref.)                       | 1 (ref.)                |
| Stroke survivors without post-stroke disability |         |                     |                               |                                |                         |
| Hemorrhagic                                     | 40,875  | 545                 | 3.4                           | 1.56 (1.43, 1.71)              | 2.43 (2.21, 2.67)       |
| Ischemic                                        | 155,551 | 2,678               | 4.5                           | 2.05 (1.95, 2.16)              | 2.17 (2.06, 2.30)       |
| Stroke survivors with post-stroke disability    |         |                     |                               |                                |                         |
| Hemorrhagic                                     | 6,475   | 203                 | 8.0                           | 3.66 (3.18, 4.22)              | 5.34 (4.62, 6.16)       |
| Ischemic                                        | 20,457  | 601                 | 7.5                           | 3.44 (3.15, 3.76)              | 3.48 (3.18, 3.81)       |
| Other fracture                                  |         |                     |                               |                                |                         |
| Matched comparison group                        | 322,161 | 8,933               | 6.5                           | 1 (ref.)                       | 1 (ref.)                |

|                                                 |             |         |       |     |                   |                   |
|-------------------------------------------------|-------------|---------|-------|-----|-------------------|-------------------|
| Stroke survivors without post-stroke disability |             |         |       |     |                   |                   |
|                                                 | Hemorrhagic | 40,875  | 1,220 | 7.7 | 1.20 (1.13, 1.27) | 1.19 (1.12, 1.26) |
|                                                 | Ischemic    | 155,551 | 4,471 | 7.5 | 1.17 (1.13, 1.21) | 1.16 (1.11, 1.20) |
| Stroke survivors with post-stroke disability    |             |         |       |     |                   |                   |
|                                                 | Hemorrhagic | 6,475   | 241   | 9.6 | 1.48 (1.30, 1.68) | 1.49 (1.31, 1.70) |
|                                                 | Ischemic    | 20,457  | 677   | 8.5 | 1.32 (1.22, 1.42) | 1.31 (1.21, 1.42) |

490 IR, incidence rate; HR, hazard ratio; CI, confidence interval

491 Model 2: adjusted for age, sex, area of residence, insulin, diabetes mellitus, hypertension, dyslipidemia, smoking, alcohol consumption, and body mass index

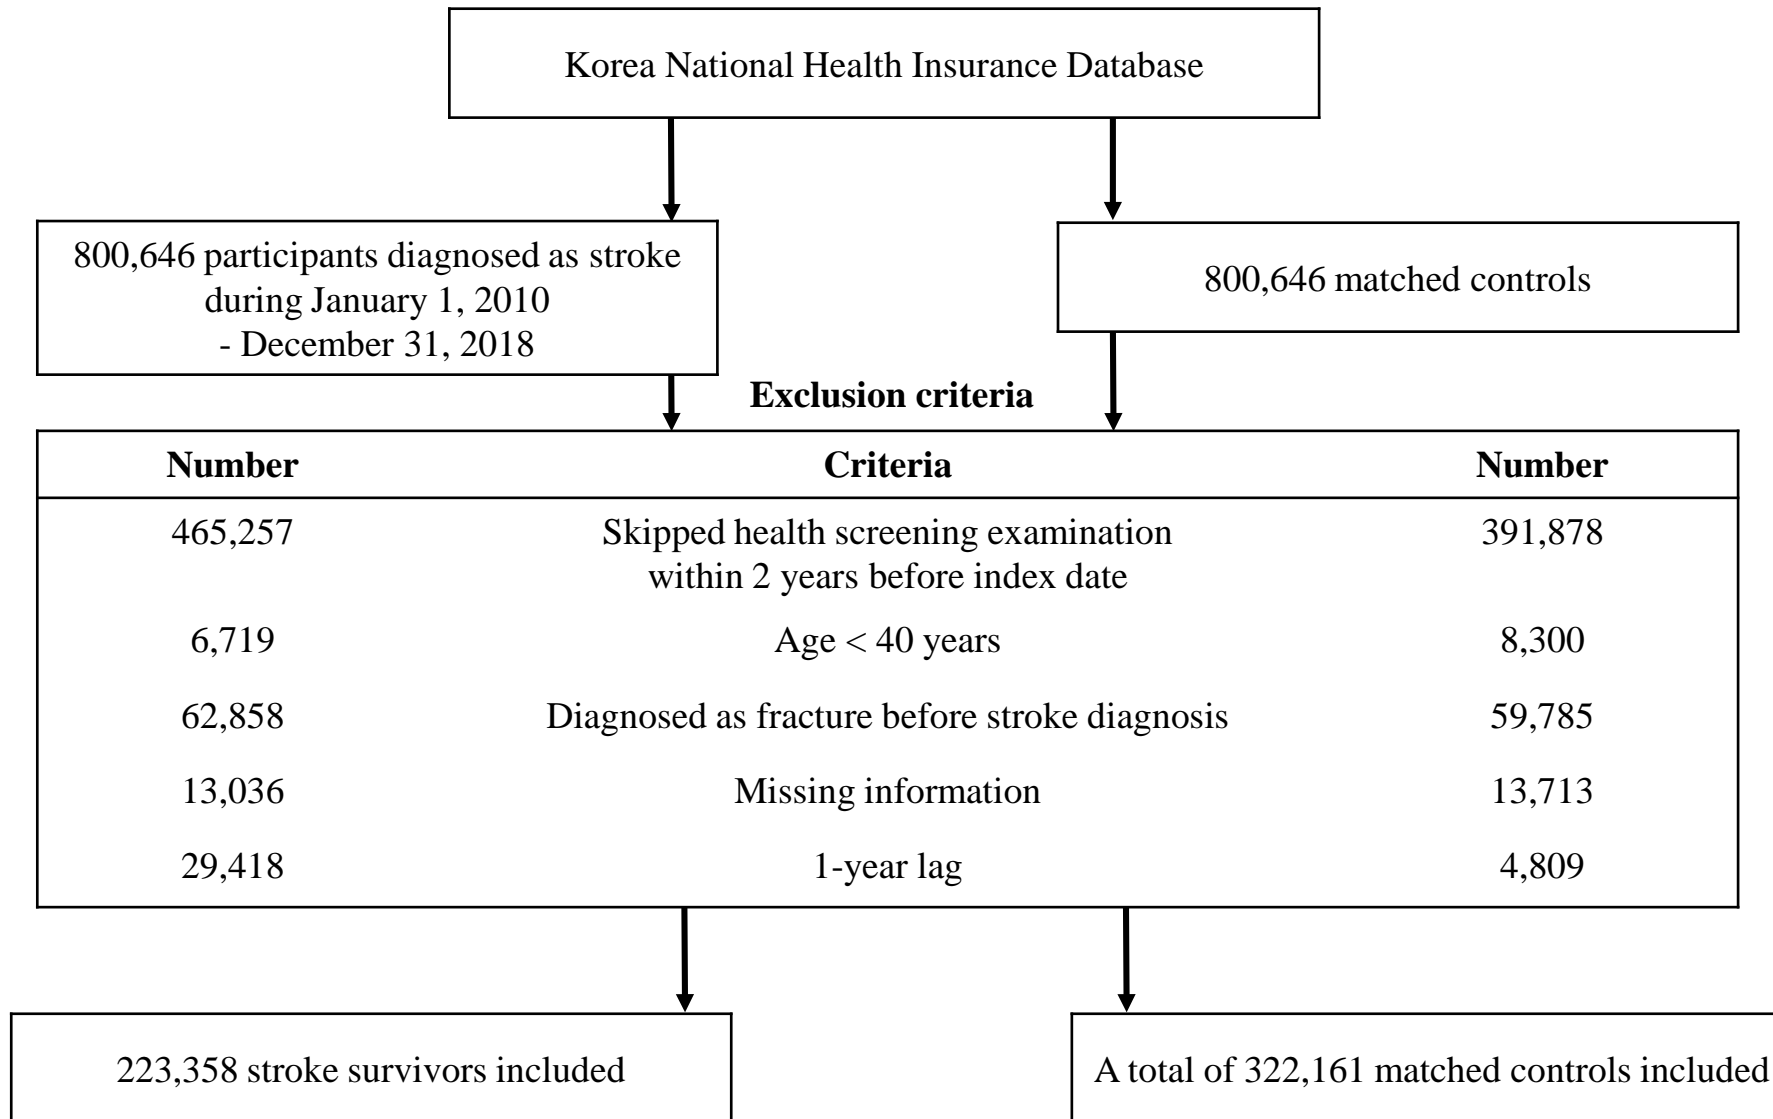

(A)

Overall Fracture

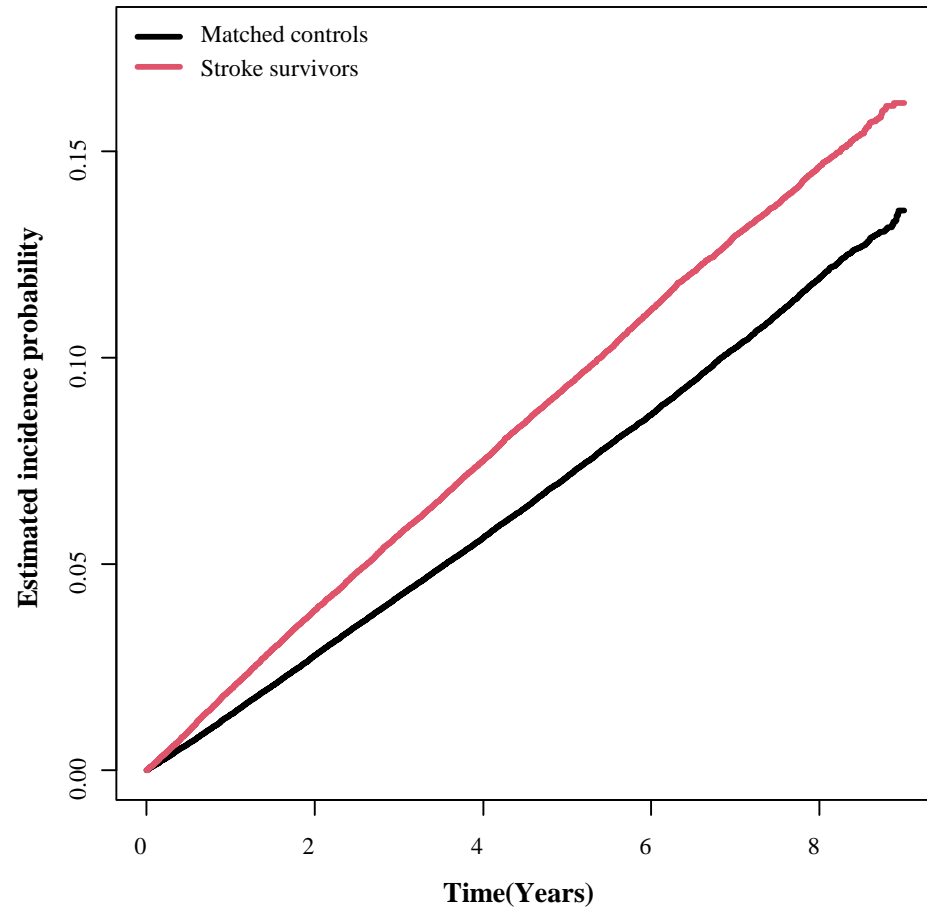

(B)

Overall Fracture

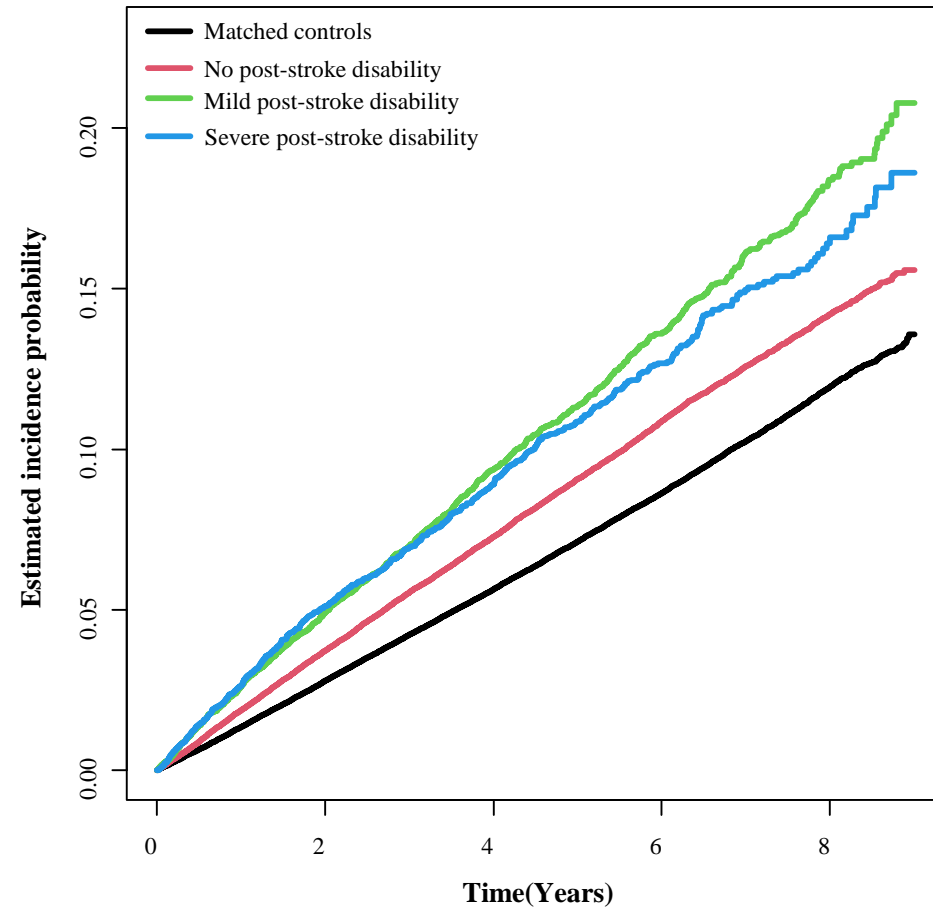

Source: https://medrxiv.org/content/10.1101/2023.12.19.23300259.full.pdf
